# Supplementary material for: Two Modes of Transcriptional Activation at Native Promoters by NF-κB p65
Source: PLoS Biol. 2009 Mar 31;7(3):e1000073. doi: 10.1371/journal.pbio.1000073 (PMC2661965; doi:10.1371/journal.pbio.1000073)
Supplement: Table S2 — (113 KB DOC) [file pbio.1000073.st002.doc]

Table S2: Over-represented motifs in TNF--induced gene promoters

A. Over-represented in both both Trap-80-dependent and –independent *vs* all mouse promoters:

| Motif: | TransFac matrix: | p-value: | Note: |
| --- | --- | --- | --- |
| NF-B | M00054 | 2x10-9 |  |
| p65 | M00052 | 2x10-8 |  |
| p50 | M00051 | 3x10-6 |  |
| Hen-1 | M00068 | 5x10-8 | E-box |
|  | M00058 | 2x10-7 | E-box |
| Tal-1/ITF2 | M00070 | 10-6 | E-box |
| E47 | M00071 | 10-5 | E-box |

B. Over-represented in Trap-80-independent *vs* all mouse promoters:

| Motif: | TransFac matrix: | p-value: | Note: |
| --- | --- | --- | --- |
| Pax-4 | M00380 | 6x10-10 | E-box |
| GC-box | M00255 | 7x10-7 | inc. Sp-1 binding site |
| NF-B | M00194 | 3x10-3 |  |

C. Over-represented in Trap-80-dependent *vs* all mouse promoters:

| Motif: | TransFac matrix: | p-value: | Note: |
| --- | --- | --- | --- |
| TATA | M00252 | 4x10-6 |  |

D. Over-represented in Trap-80-dependent *vs* Trap-80-independent promoters:

| Motif: | TransFac matrix: | p-value: | Note: |
| --- | --- | --- | --- |
| Ap-1 | M00517 | 2x10-13 |  |
|  | M00199 | 10-10 |  |
|  | M00174 | 3x10-9 |  |
|  | M00188 | 2x10-5 |  |
|  | M00173 | 10-3 |  |
| v-Jun | M00036 | 10-4 |  |
| NF-E2 | M00037 | 3x10-9 | inc. Ap-1 binding site |
| Tcf-11/MafG | M00284 | 2x10-4 | inc. Ap-1 binding site |
| HSF-1 | M00146 | 2x10-4 |  |
| HSF-2 | M00147 | 2x10-3 |  |
| TATA | M00252 | 2x10-3 |  |
